# Supplementary material for: A bioactivated in vivo assembly (BIVA) nanotechnology fabricated NIR probe for small pancreatic tumor intraoperative navigation imaging
Source: Research Square preprint supplement (doi:10.21203/rs.3.rs-445085/v1), 2021-04-30

## Reporting Summary

Nature Research wishes to improve the reproducibility of the work that we publish. This form provides structure for consistency and transparency in reporting. For further information on Nature Research policies, see our [Editorial Policies](#) and the [Editorial Policy Checklist](#).

Please do not complete any field with "not applicable" or n/a. Refer to the help text for what text to use if an item is not relevant to your study.

**For final submission:** please carefully check your responses for accuracy; you will not be able to make changes later.

## Statistics

For all statistical analyses, confirm that the following items are present in the figure legend, table legend, main text, or Methods section.

n/a Confirmed

- ☐ ☒ The exact sample size ( $n$ ) for each experimental group/condition, given as a discrete number and unit of measurement
- ☐ ☒ A statement on whether measurements were taken from distinct samples or whether the same sample was measured repeatedly
- ☐ ☒ The statistical test(s) used AND whether they are one- or two-sided  
*Only common tests should be described solely by name; describe more complex techniques in the Methods section.*
- ☐ ☒ A description of all covariates tested
- ☐ ☒ A description of any assumptions or corrections, such as tests of normality and adjustment for multiple comparisons
- ☐ ☒ A full description of the statistical parameters including central tendency (e.g. means) or other basic estimates (e.g. regression coefficient) AND variation (e.g. standard deviation) or associated estimates of uncertainty (e.g. confidence intervals)
- ☐ ☒ For null hypothesis testing, the test statistic (e.g.  $F$ ,  $t$ ,  $r$ ) with confidence intervals, effect sizes, degrees of freedom and  $P$  value noted  
*Give  $P$  values as exact values whenever suitable.*
- ☒ ☐ For Bayesian analysis, information on the choice of priors and Markov chain Monte Carlo settings
- ☐ ☒ For hierarchical and complex designs, identification of the appropriate level for tests and full reporting of outcomes
- ☐ ☒ Estimates of effect sizes (e.g. Cohen's  $d$ , Pearson's  $r$ ), indicating how they were calculated

*Our web collection on [statistics for biologists](#) contains articles on many of the points above.*

## Software and code

Policy information about [availability of computer code](#)

Data collection Circular dichroism spectroscopy (JASCO Corporation, JC-1500); Attenuated total reflectance

Data analysis Bar graph, curves and the relevant statistics were analyzed by Microsoft office 2019

For manuscripts utilizing custom algorithms or software that are central to the research but not yet described in published literature, software must be made available to editors and reviewers. We strongly encourage code deposition in a community repository (e.g. GitHub). See the Nature Research [guidelines for submitting code & software](#) for further information.

Data Policy information about [availability of data](#)

All manuscripts must include a [data availability statement](#). This statement should provide the following information, where applicable:

- Accession codes, unique identifiers, or web links for publicly available datasets
- A list of figures that have associated raw data
- A description of any restrictions on data availability

All the primary data that support the findings of this study are available from the corresponding author on request.

## Field-specific reporting

Please select the one below that is the best fit for your research. If you are not sure, read the appropriate sections before making your selection.

- ☒ Life sciences ☐ Behavioural & social sciences ☐ Ecological, evolutionary & environmental sciences

For a reference copy of the document with all sections, see [nature.com/documents/nr-reporting-summary-flat.pdf](https://nature.com/documents/nr-reporting-summary-flat.pdf)

## Life sciences study design

All studies must disclose on these points even when the disclosure is negative.

Sample size Sample sizes were based on our previous experience and other publications. The sample size was 3.

Data exclusions No data were excluded from the analyses.

Replication All experiments were replicated at least twice. The biological replicates were n=3, 5.

Randomization All samples were allocated to groups randomly.

Blinding For the in vivo end-point evaluations, the investigators were blinded to group allocation during data collection and analysis.

## Behavioural &amp; social sciences study design

All studies must disclose on these points even when the disclosure is negative.

Study description Briefly describe the study type including whether data are quantitative, qualitative or mixed.

Research sample

State the research sample (e.g. Harvard university undergraduates, villagers in ru

Sampling strategy

Describe the sampling procedure (e.g. random, snowball, stratified, convenience)

Data collection

Provide details about the data collection procedure, including the instruments or

Timing

Indicate the start and stop dates of data collection. If there is a gap between collection

Data exclusions

If no data were excluded from the analyses, state so OR if data were excluded, pro

Non-participation

State how many participants dropped out/declined participation and the reason(s)

Randomization

If participants were not allocated into experimental groups, state so OR describe ho

Ecological, evolutionary & environmental sciences study design

All studies must disclose on these points even when the disclosure is negative.

Study description

Briefly describe the study. For quantitative data include treatment factors and

Research sample

Describe the research sample (e.g. a group of tagged Passer domesticus, all Stenoc

Sampling strategy

Note the sampling procedure. Describe the statistical methods that were used to

Data collection

Describe the data collection procedure, including who recorded the data and

Timing and spatial scale

Indicate the start and stop dates of data collection, noting the frequenc

Data exclusions

If no data were excluded from the analyses, state so OR if data were excluded, des

Reproducibility

Describe the measures taken to verify the reproducibility of experimental findings

Randomization

Describe how samples/organisms/participants were allocated into groups. If allocatio

Blinding

Describe the extent of blinding used during data acquisition and analysis. If blinding wa

Did the study involve field work?

☐ Yes
☐ No

Field work, collection and transport

Field conditions

Describe the study conditions for field work, providing relevant parameters (e.g.

Location

State the location of the sampling or experiment, providing relevant parameters (e.g. lat

Access & import/export

Describe the efforts you have made to access habitats and to collect and im

Disturbance

Describe any disturbance caused by the study and how it was

Reporting for specific materials, systems and methods

We require information from authors about some types of materials, experimental systems and methods used in many studies. Here, indicate whether each material, system or method listed is relevant to your study. If you are not sure if a list item applies to your research, read the appropriate section before selecting a response.

Materials & experimental systems

Methods <sub>n/a</sub>

n/a

Involvement in the study

☒

☐

Antibodies

☒

☐

Eukaryotic cell lines

☒

☐

Palaeontology and archaeology

☐

☒

Animals and other organisms

☒

☐

Human research participants

☒

☐

Clinical data

☒

☐

Dual use research of concern

Involvement in the study

☒

☐

ChIP-seq

☒

☐

Flow cytometry

☒

☐

MRI-based neuroimaging

Antibodies

Antibodies used

Describe all antibodies used in the study; as applicable, provide supplier name, c

Validation

Describe the validation of each primary antibody for the species and application, notin

Eukaryotic cell lines

Policy information about [cell lines](#)

Cell line source(s)

State the source of each cell line

Authentication

Describe the authentication procedures for each cell line used OR declare that none

Mycoplasma contamination

Confirm that all cell lines tested negative for mycoplasma contamination

Commonly misidentified lines

(See [ICLAC](#) register)

Name any commonly misidentified cell lines used in the study and provide a rationale for their use.

Palaeontology and Archaeology

Specimen provenance

Provide provenance information for specimens and describe permits that were ob

Specimen deposition

Indicate where the specimens have been deposited to permit free access by othe

Dating methods

If new dates are provided, describe how they were obtained (e.g. collection, stora

Tick this box to confirm that the raw and calibrated dates are available in the paper or in Supplementary Information.

Ethics oversight

Identify the organization(s) that approved or provided guidance on the study prot

Note that full information on the approval of the study protocol must also be provided in the manuscript.

Animals and other organisms

Policy information about [studies involving animals](#); [ARRIVE guidelines](#) recommended for reporting a

Laboratory animals

For laboratory animals, report species, strain, sex and age OR state that the s

Wild animals

This study did not involve wild animals.

Field-collected samples

This study did not involve samples collected from fields.

Ethics oversight

All the animal experiments were performed in accordance with the Guide for the C

Note that full information on the approval of the study protocol must also be provided in the manuscript.

Human research participants

Policy information about studies involving human research participants

Population characteristicsDescribe the covariate-relevant population characteristics of the human

RecruitmentDescribe how participants were recruited. Outline any potential self-selection bias or

Ethics oversightIdentify the organization(s) that approved the study

Note that full information on the approval of the study protocol must also be provided in the manuscript.

Clinical dataPolicy information about clinical studies

All manuscripts should comply with the ICMJE guidelines for publication of clinical research and a completed CONSORT checklist must be included with all submissions.

Clinical trial registrationProvide the trial registration number from ClinicalTrials.gov or an eq

Study protocolNote where the full trial protocol can be accessed OR if not available, explain

Data collectionDescribe the settings and locales of data collection, noting the time periods of r

OutcomesDescribe how you pre-defined primary and secondary outcome measures and how you assessed

Dual use research of concernPolicy information about dual use research of concernHazards

Could the accidental, deliberate or reckless misuse of agents or technologies generated in the work, or the application of information presented in the manuscript, pose a threat to:

- | No                       | Yes                                                 |
|--------------------------|-----------------------------------------------------|
| <input type="checkbox"/> | <input type="checkbox"/> Public health              |
| <input type="checkbox"/> | <input type="checkbox"/> National security          |
| <input type="checkbox"/> | <input type="checkbox"/> Crops and/or livestock     |
| <input type="checkbox"/> | <input type="checkbox"/> Ecosystems                 |
| <input type="checkbox"/> | <input type="checkbox"/> Any other significant area |

Experiments of concern

Does the work involve any of these experiments of concern:

- | No                       | Yes                                                                                                  |
|--------------------------|------------------------------------------------------------------------------------------------------|
| <input type="checkbox"/> | <input type="checkbox"/> Demonstrate how to render a vaccine ineffective                             |
| <input type="checkbox"/> | <input type="checkbox"/> Confer resistance to therapeutically useful antibiotics or antiviral agents |
| <input type="checkbox"/> | <input type="checkbox"/> Enhance the virulence of a pathogen or render a nonpathogen virulent        |
| <input type="checkbox"/> | <input type="checkbox"/> Increase transmissibility of a pathogen                                     |
| <input type="checkbox"/> | <input type="checkbox"/> Alter the host range of a pathogen                                          |
| <input type="checkbox"/> | <input type="checkbox"/> Enable evasion of diagnostic/detection modalities                           |
| <input type="checkbox"/> | <input type="checkbox"/> Enable the weaponization of a biological agent or toxin                     |
| <input type="checkbox"/> | <input type="checkbox"/> Any other potentially harmful combination of experiments and agents         |

ChIP-seq

Data deposition

Confirm that both raw and final processed data have been deposited in a public database such as GEO.

Confirm that you have deposited or provided access to graph files (e.g. BED files) for the called peaks.

Data access links

For "Initial submission" or "Revised version" documents, provide review

May remain private before publication. data.

Files in database submissionProvide a list of all files available in the database

Genome browser session  
(e.g. UCSC)

Provide a link to an anonymized genome browser session for "Initial submission" and "Revised version" documents only, to enable peer review. Write "no longer applicable" for "Final submission" documents.

Methodology

ReplicatesDescribe the experimental replicates, specifying number, type and replicate

Sequencing depthDescribe the sequencing depth for each experiment, providing the total number of

AntibodiesDescribe the antibodies used for the ChIP-seq experiments; as applicable, provide suppl

Peak calling parametersSpecify the command line program and parameters used for read mapping and

Data qualityDescribe the methods used to ensure data quality in full detail, including how many p

SoftwareDescribe the software used to collect and analyze the ChIP-seq data. For custom code that

Flow Cytometry

Plots

Confirm that:

The axis labels state the marker and fluorochrome used (e.g. CD4-FITC).

## Methodology

**Sample preparation** Describe the sample preparation, detailing the biological source of the cells and the experimental conditions.

**Instrument** Identify the instrument used for data collection, specifying make and model.

**Software** Describe the software used to collect and analyze the flow cytometry data. For custom code, provide a link to the repository.

**Cell population abundance** Describe the abundance of the relevant cell populations within post-sort samples.

**Gating strategy** Describe the gating strategy used for all relevant experiments, specifying the parameters and gates used.

Tick this box to confirm that a figure exemplifying the gating strategy is provided in the Supplementary Information.

## Magnetic resonance imaging

### Experimental design

**Design type** Indicate task or resting state; event-related or block.

**Design specifications** Specify the number of blocks, trials or experimental units per session and/or condition.

**Behavioral performance measures** State number and/or type of variables recorded (e.g. correct button presses, reaction time).

### Acquisition

**Imaging type(s)** Specify: functional, structural, diffusion, or combination.

**Field strength** Specify in Tesla.

**Sequence & imaging parameters** Specify the pulse sequence type (gradient echo, spin echo, etc.), imaging parameters (TR, TE, etc.), and any other relevant parameters.

**Area of acquisition** State whether a whole brain scan was used OR define the area of acquisition, coordinates, and slice thickness.

Diffusion MRI ☐ Used ☐ Not used

### Preprocessing

**Preprocessing software** Provide detail on software version and revision number and on specific parameters used.

**Normalization** If data were normalized/standardized, describe the approach(es): specify linear or non-linear, and the template used.

**Normalization template** Describe the template used for normalization/transformation, specifying subject ID and version.

**Noise and artifact removal** Describe your procedure(s) for artifact and structured noise removal, specifying software and parameters.

**Volume censoring** Define your software and/or method and criteria for volume censoring, and state the percentage of volumes censored.

**Statistical modeling & inference**

**Model type and settings** Specify type (mass univariate, multivariate, RSA, predictive, etc.) and details of the model.

**Effect(s) tested** Define precise effect in terms of the task or stimulus conditions instead of psychological terms.

Specify type of analysis: ☐ Whole brain ☐ ROI-based ☐ Both

Statistic type for inference  
(See [Eklund et al. 2016](#))

Specify voxel-wise or cluster-wise and report all relevant parameters for cluster-wise methods.

**Correction** Describe the type of correction and how it is obtained for multiple comparisons (e.g. FDR, Bonferroni, permutation).

**Models & analysis**

| n/a                      | Involved in the study                                                 |
|--------------------------|-----------------------------------------------------------------------|
| <input type="checkbox"/> | <input type="checkbox"/> Functional and/or effective connectivity     |
| <input type="checkbox"/> | <input type="checkbox"/> Graph analysis                               |
| <input type="checkbox"/> | <input type="checkbox"/> Multivariate modeling or predictive analysis |

**Functional and/or effective connectivity** Report the measures of dependence used and the model details.

**Graph analysis** Report the dependent variable and connectivity measure, specifying weighted graph or unweighted.

**Multivariate modeling and predictive analysis** Specify independent variables, features extraction and model details.

This checklist template is licensed under a Creative Commons Attribution 4.0 International License, which permits use, sharing, adaptation, distribution and reproduction in any medium or format, as long as you give appropriate credit to the original author(s) and the source, provide a link to the Creative Commons license, and indicate if changes were made. The images or other third party material in this article are included in the article's Creative Commons license, unless indicated otherwise in a credit line to the material. If material is not included in the article's Creative Commons license and your intended use is not permitted by statutory regulation or exceeds the permitted use, you will need to obtain permission directly from the copyright holder. To view a copy of this license, visit <http://creativecommons.org/licenses/by/4.0/>

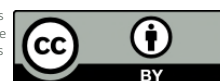

Supplement: Supplementary file 1 [file 5990a65c8753ec2cd2eecdb1.pdf]
